# Supplementary material for: The neurogenic basic helix–loop–helix transcription factor NeuroD6 concomitantly increases mitochondrial mass and regulates cytoskeletal organization in the early stages of neuronal differentiation
Source: PubMed Central journal article supplement — ASN Neuro. 2009 Sep 16;1(4):e00016. doi: 10.1042/AN20090036 (PMC2785511; doi:10.1042/an20090036), 2009-09-16
Supplement: an001e016add.pdf [file an001e016add.pdf]

# The neurogenic basic helix–loop–helix transcription factor NeuroD6 concomitantly increases mitochondrial mass and regulates cytoskeletal organization in the early stages of neuronal differentiation

Kristin Kathleen Baxter<sup>\*†</sup>, Martine Uittenbogaard<sup>\*</sup>, Jeongae Yoon<sup>\*</sup> and Anne Chiaramello<sup>\*†1</sup>

<sup>\*</sup>Department of Anatomy and Regenerative Biology, George Washington University Medical Center, 2300 I Street N.W., Washington, DC 20037, U.S.A.

<sup>†</sup>Molecular Medicine Program, Institute of Biomedical Sciences, George Washington University, 2300 I Street N.W., Washington, DC 20037, U.S.A.

Cite this article as: Baxter KK, Uittenbogaard M, Yoon J and Chiaramello A (2009) The neurogenic basic helix–loop–helix transcription factor NeuroD6 concomitantly increases mitochondrial mass and regulates cytoskeletal organization in the early stages of neuronal differentiation. ASN NEURO 1(4):art:e00016.doi:10.1042/AN20090036

## SUPPLEMENTARY ONLINE DATA

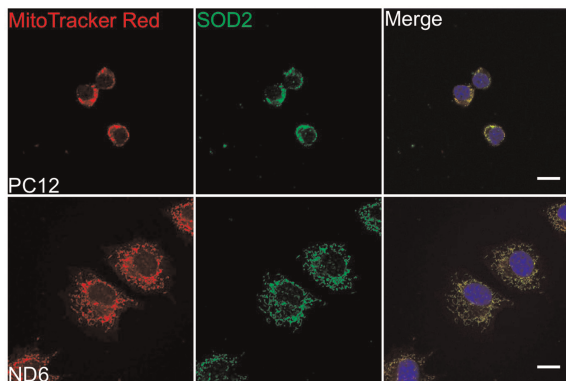

Figure S1 MTR labels the entire mitochondrial population of PC12 and PC12-ND6 cells

Control PC12 and PC12-ND6 cells were stained with MTR (red), anti-SOD2 antibody (green) and TO-PRO<sup>®</sup>-3 (blue). The corresponding merged images demonstrate perfect overlapping expression pattern between the mitochondrial protein SOD2 and MTR in both PC12 and PC12-ND6 cells. Scale bar, 10  $\mu$ m.

<sup>1</sup>To whom correspondence should be addressed (email [anaaec@gwumc.edu](mailto:anaaec@gwumc.edu)).

© 2009 The Author(s) This is an Open Access article distributed under the terms of the Creative Commons Attribution Non-Commercial Licence (<http://creativecommons.org/licenses/by-nc/2.5/>) which permits unrestricted non-commercial use, distribution and reproduction in any medium, provided the original work is properly cited.

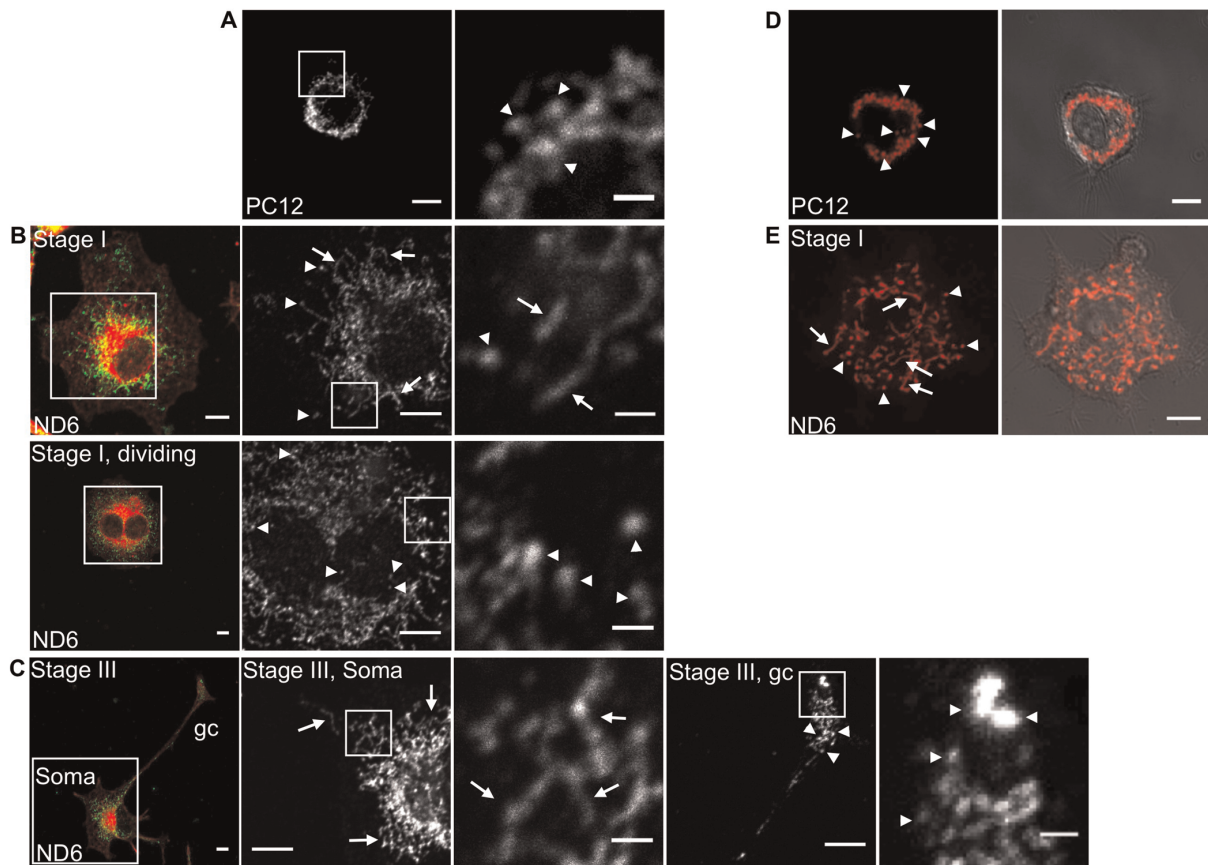

**Figure S2 Mitochondria display distinct morphology at specific stages of neuronal differentiation in PC12-ND6 cells**

Arrowheads indicate short and punctate mitochondria, whereas arrows indicate elongated and tubular mitochondria. (A–C) Untreated PC12 and PC12-ND6 cells were fixed and labelled with antibodies against SOD2 (green) and  $\beta$ -III-tubulin (red) to examine mitochondrial morphology and delineate the overall shape of the cells by confocal fluorescence microscopy. (A) Naïve PC12 cells (left-hand panel; scale bar, 5  $\mu$ m) with corresponding high magnification of the boxed area (right-hand panel) illustrating the short and punctate morphology of mitochondria (arrowheads; scale bar, 1  $\mu$ m). (B) Stage I non-dividing PC12-ND6 cells (top row; scale bar, 5  $\mu$ m) and stage I dividing PC12-ND6 cells (bottom row; scale bar, 5  $\mu$ m) with corresponding high magnification images of the boxed region illustrating the morphology of mitochondria (right-hand panels; scale bars, 1  $\mu$ m); far right images show high magnification of mitochondria (arrowheads for short mitochondria and arrows for elongated mitochondria). (C) Stage III PC12-ND6 cells (left-hand panel; scale bar, 5  $\mu$ m), with corresponding magnification images from the soma (second panel; scale bar, 5  $\mu$ m) and the growth cone (third panel; gc; scale bar, 5  $\mu$ m). The images to the right of each subcellular location show high magnification of mitochondria corresponding to that subcellular region (arrowhead, short mitochondria; arrow, elongated mitochondria; scale bar, 1  $\mu$ m). Images are reflective of the predominant mitochondrial morphology observed a minimum of 25 cells from three independent experiments. (D and E) Live-cell confocal imaging on PC12 (D) and stage I PC12-ND6 (E) cells labelled with MTR. The right-hand panels show the merge with the corresponding DIC (differential interference contrast) pictures (scale bar, 5  $\mu$ m).

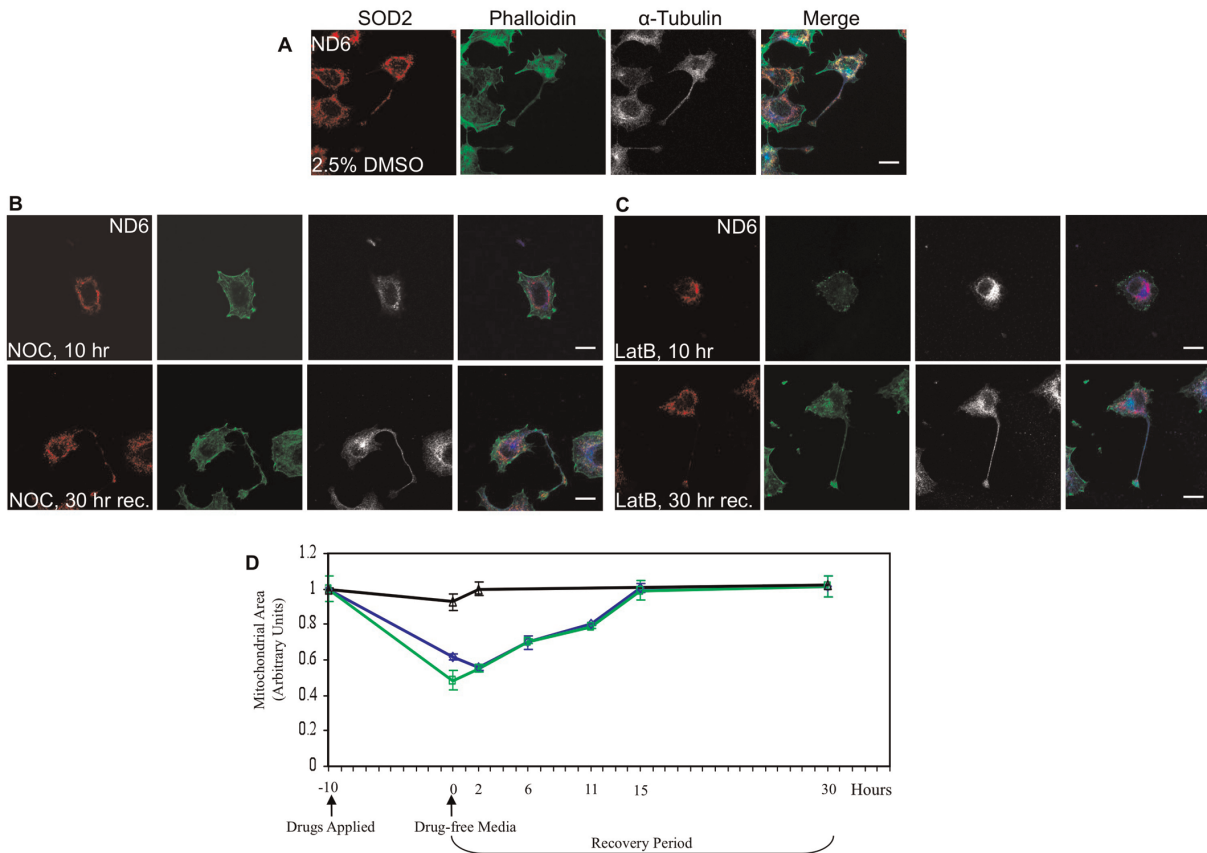

**Figure S3** Nocodazole and latrunculin B treatment results in decreased mitochondrial area in PC12-ND6 cells

(A) PC12-ND6 cells were treated with 2.5% DMSO for 10 h and subsequently labelled with anti-SOD2 antibody (red), Alexa Fluor<sup>®</sup> 488-phalloidin (green) and anti- $\alpha$ -tubulin antibody (grey, and blue in merge panels). Scale bar, 10  $\mu$ m. (B) Reversible effect of nocodazole exposure on the mitochondrial area of PC12-ND6 cells. The top row shows PC12-ND6 cells treated with 10  $\mu$ g/ml nocodazole (NOC) for 10 h and subsequently labelled with anti-SOD2 antibody (red), Alexa Fluor<sup>®</sup> 488-phalloidin (green) and anti- $\alpha$ -tubulin antibody (grey, and blue in merge panels). After 10 h of treatment, PC12-ND6 cells were transferred to drug-free medium for the indicated recovery period (bottom row). Scale bar, 10  $\mu$ m. (C) Reversible effect of latrunculin B exposure on the mitochondrial area of PC12-ND6 cells. The top row shows PC12-ND6 cells treated with 15  $\mu$ M latrunculin B (LatB) for 10 h and subsequently labelled with anti-SOD2 antibody (red), Alexa Fluor<sup>®</sup> 488-phalloidin (green) and anti- $\alpha$ -tubulin antibody (grey, and blue in merge panels). After 10 h of treatment, PC12-ND6 cells were transferred to drug-free medium for the indicated recovery period (bottom row). Scale bar, 10  $\mu$ m. (D) Quantification of mitochondrial area in PC12-ND6 cells before, during and after treatment with nocodazole or latrunculin B. Control (2.5% DMSO), black; latrunculin B, green; nocodazole, blue. Arrows indicate time of drug application and removal. The graph is representative of three independent experiments, and results are means  $\pm$  S.D. from  $n=150$  cells per treatment.

Received 16 July 2009/20 August 2009; accepted 21 August 2009

Published as Immediate Publication 21 August 2009, doi 10.1042/AN20090036
